# Supplementary material
Source: PubMed Central journal article supplement (PMC307597)

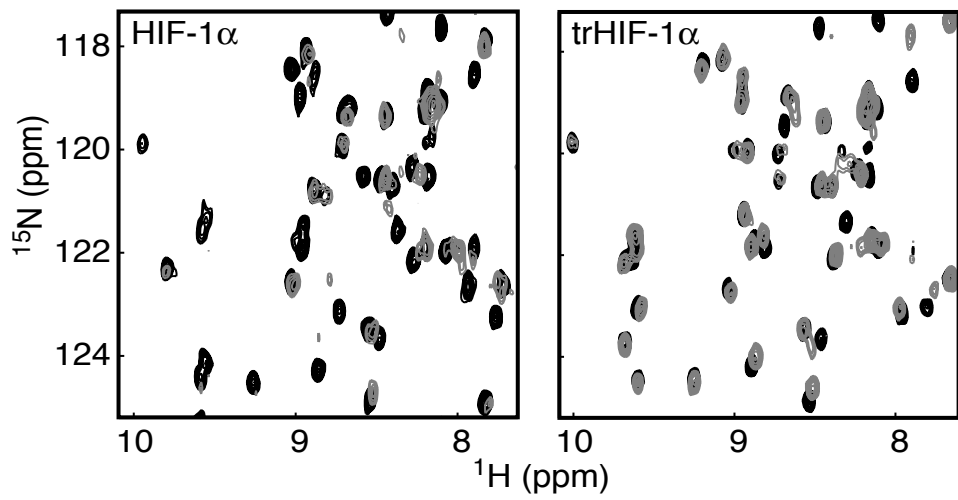

Supplement: pnas_100_26_15504__3.pdf [file pnas_100_26_15504__3.pdf]
